# Supplementary material
Source: Royal Society of Chemistry journal article supplement (https://www.rsc.org/suppdata/dt/1999/4463/907668i.doc)
Supplement: Supplementary file 1 [file 907668i.doc]

Table SM1. Magnetic susceptibility values (per mole of copper) for the polymeric [Cu2L(O2CC5H4N)].C2H5OH (**1)** at different temperatures

| Temp. (K) | M (cm3mol-1) | | | | |
| --- | --- | --- | --- | --- | --- |
| 22.6256 | | 0.010645 | |  | |
| 26.13066 | | 0.009149 | |  | |
| 28.71946 | | 0.008343 | |  | |
| 30.89804 | | 0.007565 | |  | |
| 32.55696 | | 0.007202 | |  | |
| 34.05511 | | 0.006842 | |  | |
| 35.41383 | | 0.006498 | |  | |
| 36.69271 | | 0.006316 | |  | |
| 37.85255 | | 0.006136 | |  | |
| 38.87653 | | 0.005857 | |  | |
| 39.83793 | | 0.005724 | |  | |
| 40.81048 | | 0.005603 | |  | |
| 41.8396 | | 0.005474 | |  | |
| 42.79446 | | 0.005284 | |  | |
| 44.32632 | | 0.00514 | |  | |
| 45.37947 | | 0.004971 | |  | |
| 47.0133 | | 0.004866 | |  | |
| 51.89385 | | 0.004416 | |  | |
| 54.11058 | | 0.004294 | |  | |
| 55.44316 | | 0.004143 | |  | |
| 56.76789 | | 0.004051 | |  | |
| 56.85509 | | 0.004039 | |  | |
| 57.56231 | | 0.004016 | |  | |
| 58.13878 | | 0.003955 | |  | |
| 58.94773 | | 0.003922 | |  | |
| 59.32463 | | 0.003878 | |  | |
| 60.33727 | | 0.003812 | |  | |
| 61.16494 | | 0.00378 | |  | |
| 61.20655 | | 0.003799 | |  | |
| 61.28978 | | 0.003749 | |  | |
| 62.18683 | | 0.0037 | |  | |
| 63.08019 | | 0.003639 | |  | |
| 63.8586 | | 0.0036 | |  | |
| 64.61492 | | 0.003555 | |  | |
| 65.34913 | | 0.003527 | |  | |
| 66.04353 | | 0.003478 | |  | |
| 66.70694 | | 0.00346 | |  | |
| 67.33796 | | 0.003414 | |  | |
| 67.97373 | | 0.003398 | |  | |
| 68.64768 | | 0.00336 | |  | |
| 69.33434 | | 0.00333 | |  | |
| 70.04864 | | 0.003305 | |  | |
| 70.82987 | | 0.003267 | |  | |
| 71.66203 | | 0.003236 | |  | |
| 72.47053 | | 0.003203 | |  | |
| 73.25092 | | 0.003168 | |  | |
| Temp. (K) | M (cm3mol-1) | | | | |
| 74.1461 | | 0.003136 | |  | |
| 75.02013 | | 0.003106 | |  | |
| 75.86135 | | 0.003073 | |  | |
| 76.76514 | | 0.003039 | |  | |
| 78.63062 | | 0.002969 | |  | |
| 79.53484 | | 0.002941 | |  | |
| 80.44659 | | 0.002913 | |  | |
| 81.39603 | | 0.002878 | |  | |
| 82.35677 | | 0.002853 | |  | |
| 83.29891 | | 0.002829 | |  | |
| 84.25075 | | 0.002803 | |  | |
| 84.89745 | | 0.002769 | |  | |
| 86.17629 | | 0.002737 | |  | |
| 87.14476 | | 0.002718 | |  | |
| 88.07432 | | 0.002691 | |  | |
| 89.07403 | | 0.002664 | |  | |
| 90.04571 | | 0.002637 | |  | |
| 91.00321 | | 0.00262 | |  | |
| 91.93909 | | 0.002594 | |  | |
| 92.90883 | | 0.002571 | |  | |
| 93.8888 | | 0.002546 | |  | |
| 94.8586 | | 0.00253 | |  | |
| 95.86566 | | 0.002502 | |  | |
| 96.83803 | | 0.002483 | |  | |
| 97.77982 | | 0.002464 | |  | |
| 97.88811 | | 0.002473 | |  | |
| 98.22937 | | 0.002464 | |  | |
| 98.75768 | | 0.002441 | |  | |
| 99.71575 | | 0.002421 | |  | |
| 100.691 | | 0.002394 | |  | |
| 101.6639 | | 0.002382 | |  | |
| 102.6748 | | 0.002366 | |  | |
| 103.6316 | | 0.002345 | |  | |
| 104.5768 | | 0.002327 | |  | |
| 105.5332 | | 0.00231 | |  | |
| 106.5245 | | 0.002289 | |  | |
| 107.4739 | | 0.002275 | |  | |
| 108.4727 | | 0.002267 | |  | |
| 109.4127 | | 0.002247 | |  | |
| 110.3641 | | 0.002225 | |  | |
| 111.3305 | | 0.002212 | |  | |
| 112.273 | | 0.002197 | |  | |
| 113.2423 | | 0.002183 | |  | |
| 114.197 | | 0.002166 | |  | |
| 115.1367 | | 0.002147 | |  | |
| 116.0769 | | 0.002143 | |  | |
| Temp. (K) | M (cm3mol-1) | | | | |
| 117.0361 | | 0.002121 | |  | |
| 117.9923 | | | 0.002118 |  | |
| 118.9221 | | | 0.002097 |  | |
| 119.8732 | | | 0.002091 |  | |
| 120.8177 | | | 0.002069 |  | |
| 121.7474 | | | 0.002058 |  | |
| 122.6827 | | | 0.002044 |  | |
| 123.6236 | | | 0.002028 |  | |
| 124.5576 | | | 0.002021 |  | |
| 125.4786 | | | 0.002006 |  | |
| 126.3804 | | | 0.002 |  | |
| 127.3317 | | | 0.001991 |  | |
| 128.2527 | | | 0.001977 |  | |
| 129.1691 | | | 0.001965 |  | |
| 130.1117 | | | 0.001954 |  | |
| 131.0479 | | | 0.001951 |  | |
| 131.9822 | | | 0.001943 |  | |
| 132.8977 | | | 0.001922 |  | |
| 133.8293 | | | 0.001913 |  | |
| 134.7727 | | | 0.001894 |  | |
| 135.7197 | | | 0.001891 |  | |
| 136.6372 | | | 0.001885 |  | |
| 137.5892 | | | 0.001876 |  | |
| 138.5387 | | | 0.001863 |  | |
| 139.481 | | | 0.001845 |  | |
| 140.4145 | | | 0.001827 |  | |
| 141.4032 | | | 0.001837 |  | |
| 142.334 | | | 0.001823 |  | |
| 143.2953 | | | 0.001811 |  | |
| 144.2439 | | | 0.001801 |  | |
| 145.22 | | | 0.001792 |  | |
| 146.1306 | | | 0.001786 |  | |
| 147.0829 | | | 0.001779 |  | |
| 148.0282 | | | 0.001771 |  | |
| 148.9685 | | | 0.001759 |  | |
| 149.8703 | | | 0.001753 |  | |
| 150.8 | | | 0.00174 |  | |
| 151.7106 | | | 0.001734 |  | |
| 152.6475 | | | 0.001726 |  | |
| 153.5219 | | | 0.001715 |  | |
| 154.4205 | | | 0.00171 |  | |
| 155.3384 | | | 0.0017 |  | |
| 156.2054 | | | 0.001691 |  | |
| 157.0754 | | | 0.001684 |  | |
| 157.9691 | | | 0.00168 |  | |
| 158.8499 | | | 0.001671 |  | |
| Temp. (K) | M (cm3mol-1) | | | | |
| 159.7063 | | | 0.001666 |  | |
| 160.5579 | | | 0.001667 |  | |
| 161.4096 | | | 0.00165 |  | |
| 162.2831 | | | 0.001641 |  | |
| 163.1086 | | | 0.001646 |  | |
| 163.9839 | | | 0.001631 |  | |
| 164.8027 | | | 0.001628 |  | |
| 165.6165 | | | 0.001618 |  | |
| 166.4557 | | | 0.001615 |  | |
| 167.268 | | | 0.001609 |  | |
| 168.0814 | | | 0.001599 |  | |
| 168.9137 | | | 0.001587 |  | |
| 169.7294 | | | 0.001588 |  | |
| 170.5556 | | | 0.001588 |  | |
| 171.3544 | | | 0.001576 |  | |
| 172.1252 | | | 0.001567 |  | |
| 172.939 | | | 0.001563 |  | |
| 173.7055 | | | 0.001566 |  | |
| 174.4924 | | | 0.001557 |  | |
| 175.2841 | | | 0.001552 |  | |
| 176.0639 | | | 0.001541 |  | |
| 176.8325 | | | 0.001538 |  | |
| 177.6278 | | | 0.001532 |  | |
| 178.3797 | | | 0.001528 |  | |
| 179.1504 | | | 0.001528 |  | |
| 179.8993 | | | 0.00152 |  | |
| 180.6578 | | | 0.001518 |  | |
| 181.4119 | | | 0.001512 |  | |
| 182.1798 | | | 0.001495 |  | |
| 182.9049 | | | 0.001502 |  | |
| 183.6516 | | | 0.001497 |  | |
| 184.3875 | | | 0.001497 |  | |
| 185.1017 | | | 0.00149 |  | |
| 185.8506 | | | 0.001485 |  | |
| 186.5721 | | | 0.001477 |  | |
| 187.2902 | | | 0.001478 |  | |
| 188.015 | | | 0.001471 |  | |
| 188.7292 | | | 0.001471 |  | |
| 189.4593 | | | 0.00146 |  | |
| 190.1826 | | | 0.001458 |  | |
| 190.8735 | | | 0.001462 |  | |
| 191.5708 | | | 0.00145 |  | |
| 192.2501 | | | 0.001452 |  | |
| 192.9414 | | | 0.001449 |  | |
| 193.6459 | | | 0.001446 |  | |
| 194.3361 | | | 0.001437 |  | |
| 194.9984 | | | 0.00144 |  | |
| 195.6808 | | | 0.001442 |  | |
| 196.3807 | | | 0.001433 |  | |
| Temp. (K) | M (cm3mol-1) | | | | |
| 197.0533 | | | 0.00143 |  | |
| 197.7321 | | | 0.001427 |  | |
| 198.3965 | | | 0.001423 |  | |
| 199.0474 | | | 0.001421 |  | |
| 199.7106 | | | 0.001417 |  | |
| 200.367 | | | 0.001413 |  | |
| 201.0164 | | | 0.001411 |  | |
| 201.6756 | | | 0.001414 |  | |
| 202.325 | | | 0.001411 |  | |
| 202.9831 | | | 0.001409 |  | |
| 203.6203 | | | 0.001404 |  | |
| 204.2754 | | | 0.001404 |  | |
| 204.904 | | | 0.001404 |  | |
| 205.5551 | | | 0.001399 |  | |
| 206.7825 | | | 0.001395 |  | |
| 207.4353 | | | 0.00138 |  | |
| 208.0567 | | | 0.001378 |  | |
| 209.3013 | | | 0.001369 |  | |
| 209.9279 | | | 0.00137 |  | |
| 210.5297 | | | 0.001367 |  | |
| 211.156 | | | 0.001366 |  | |
| 211.7624 | | | 0.001357 |  | |
| 214.1443 | | | 0.001346 |  | |
| 214.7566 | | | 0.001347 |  | |
| 215.355 | | | 0.001349 |  | |
| 215.9514 | | | 0.00135 |  | |
| 216.5412 | | | 0.001346 |  | |
| 217.1281 | | | 0.001348 |  | |
| 217.7149 | | | 0.001349 |  | |
| 218.292 | | | 0.001347 |  | |
| 218.8691 | | | 0.001333 |  | |
| 219.4247 | | | 0.001339 |  | |
| 220.0038 | | | 0.001338 |  | |
| 220.5887 | | | 0.001334 |  | |
| 221.153 | | | 0.001329 |  | |
| 221.6924 | | | 0.001328 |  | |
| 222.2733 | | | 0.001318 |  | |
| 222.8524 | | | 0.001323 |  | |
| 223.383 | | | 0.001314 |  | |
| 223.9569 | | | 0.001316 |  | |
| 224.5288 | | | 0.001312 |  | |
| 225.0778 | | | 0.00132 |  | |
| 225.6267 | | | 0.001305 |  | |
| 226.1795 | | | 0.00131 |  | |
| 226.7207 | | | 0.001311 |  | |
| 227.285 | | | 0.001306 |  | |
| 227.8148 | | | 0.001301 |  | |
| 228.3829 | | | 0.001303 |  | |
| 228.9126 | | | 0.001292 |  | |
| Temp. (K) | M (cm3mol-1) | | | |  |
| 229.4155 | | | 0.0013 |  | |
| 229.9836 | | | 0.001283 |  | |
| 230.534 | | | 0.001294 |  | |
| 231.0539 | | | 0.001287 |  | |
| 231.5889 | | | 0.001281 |  | |
| 232.1315 | | | 0.001276 |  | |
| 232.6815 | | | 0.001282 |  | |
| 233.1902 | | | 0.001277 |  | |
| 233.7214 | | | 0.001269 |  | |
| 234.279 | | | 0.001273 |  | |
| 234.8215 | | | 0.001269 |  | |
| 235.3339 | | | 0.001271 |  | |
| 235.8614 | | | 0.001261 |  | |
| 236.4265 | | | 0.001259 |  | |
| 236.9691 | | | 0.001268 |  | |
| 237.4801 | | | 0.00126 |  | |
| 238.0281 | | | 0.00126 |  | |
| 238.5555 | | | 0.001258 |  | |
| 239.1185 | | | 0.00125 |  | |
| 239.6734 | | | 0.00125 |  | |
| 240.1542 | | | 0.001249 |  | |
| 240.7017 | | | 0.001243 |  | |
| 241.227 | | | 0.001248 |  | |
| 241.7818 | | | 0.001247 |  | |
| 242.2553 | | | 0.00124 |  | |
| 242.8398 | | | 0.001242 |  | |
| 243.3577 | | | 0.001237 |  | |
| 243.8903 | | | 0.001232 |  | |
| 244.4415 | | | 0.001234 |  | |
| 244.9779 | | | 0.001226 |  | |
| 245.4941 | | | 0.001234 |  | |
| 246.0246 | | | 0.001229 |  | |
| 246.5913 | | | 0.001226 |  | |
| 247.1092 | | | 0.001227 |  | |
| 247.664 | | | 0.001225 |  | |
| 248.2077 | | | 0.001217 |  | |
| 248.7345 | | | 0.001218 |  | |
| 249.2686 | | | 0.001216 |  | |
| 249.8172 | | | 0.001219 |  | |
| 250.3585 | | | 0.001218 |  | |
| 250.9034 | | | 0.001205 |  | |
| 251.4448 | | | 0.001213 |  | |
| 251.9934 | | | 0.001207 |  | |
| 252.5253 | | | 0.001211 |  | |
| 253.0654 | | | 0.001208 |  | |
| 253.6104 | | | 0.001203 |  | |
| 254.1526 | | | 0.001204 |  | |
| 254.7201 | | | 0.001197 |  | |
| 255.2565 | | | 0.001201 |  | |
| Temp. (K) | M (cm3mol-1) | | | | |
| 255.8087 | | | 0.001196 |  | |
| 256.3474 | | | 0.001192 |  | |
| 256.8828 | | | 0.001199 |  | |
| 257.4182 | | | 0.001191 |  | |
| 257.9536 | | | 0.001191 |  | |
| 258.489 | | | 0.001193 |  | |
| 259.028 | | | 0.001187 |  | |
| 259.5598 | | | 0.001183 |  | |
| 260.0901 | | | 0.00119 |  | |
| 260.6197 | | | 0.001189 |  | |
| 261.1484 | | | 0.001184 |  | |
| 261.6838 | | | 0.001185 |  | |
| 262.2155 | | | 0.001182 |  | |
| 262.7416 | | | 0.001182 |  | |
| 263.2689 | | | 0.001182 |  | |
| 263.7722 | | | 0.001179 |  | |
| 264.3023 | | | 0.001183 |  | |
| 264.8285 | | | 0.001179 |  | |
| 265.33 | | | 0.001178 |  | |
| 265.8282 | | | 0.001176 |  | |
| 266.3192 | | | 0.001174 |  | |
| 266.8279 | | | 0.001177 |  | |
| 267.354 | | | 0.001171 |  | |
| 267.8486 | | | 0.001178 |  | |
| 268.3362 | | | 0.001174 |  | |
| 268.8378 | | | 0.001168 |  | |
| 269.3535 | | | 0.001171 |  | |
| 269.8796 | | | 0.001171 |  | |
| 270.3644 | | | 0.00117 |  | |
| 270.8127 | | | 0.001179 |  | |
| 271.3146 | | | 0.001163 |  | |
| 271.7636 | 0.001169 | | | | |
|  |  | | | | |
| Temp. (K) | M (cm3mol-1) | | | | |
| 276.7327 | | | 0.001144 |  | |
| 278.6913 | | | 0.001139 |  | |
| 280.65 | | | 0.00114 |  | |
| 283.3246 | | | 0.001117 |  | |
| 283.6433 | | | 0.001117 |  | |
| 283.9824 | | | 0.001111 |  | |
| 284.3419 | | | 0.001115 |  | |
| 284.5555 | | | 0.001112 |  | |
| 284.647 | | | 0.001108 |  | |
| 285.1893 | | | 0.001106 |  | |
| 285.3031 | | | 0.001108 |  | |
| 285.6755 | | | 0.001104 |  | |
| 285.7997 | | | 0.001109 |  | |
| 285.9928 | | | 0.001109 |  | |
| 286.3218 | | | 0.001108 |  | |
| 286.3388 | | | 0.00102 |  | |
| 286.6338 | | | 0.001105 |  | |
| 286.9355 | | | 0.001101 |  | |
| 287.2407 | | | 0.001105 |  | |
| 287.5459 | | | 0.0011 |  | |
| 287.8172 | | | 0.001107 |  | |
| 288.1223 | | | 0.00111 |  | |
| 288.3835 | | | 0.001107 |  | |
| 288.6581 | | | 0.001102 |  | |
| 288.926 | | | 0.001103 |  | |
| 289.174 | | | 0.00092 |  | |
| 289.2307 | | | 0.001101 |  | |
| 289.4408 | | | 0.001104 |  | |
| 289.4708 | | | 0.001105 |  | |
| 289.4742 | | | 0.001098 |  | |
| 289.5342 | | | 0.001097 |  | |
|  |  | | | |  |
|  |  | | | |  |
| Temp. (K) | M (cm3mol-1) | | | |  |
| 289.5409 | | | 0.0011 |  | |
| 289.691 | | | 0.001097 |  | |
| 289.9711 | | | 0.0011 |  | |
| 290.2012 | | | 0.001098 |  | |
| 290.4589 | | | 0.001103 |  | |
| 290.6963 | | | 0.001101 |  | |
| 290.9201 | | | 0.001102 |  | |
| 291.1235 | | | 0.001097 |  | |
| 291.3304 | | | 0.001097 |  | |
| 291.5338 | | | 0.001096 |  | |
| 291.7203 | | | 0.001093 |  | |
| 291.9034 | | | 0.001095 |  | |
| 292.0918 | | | 0.001093 |  | |
| 292.2419 | | | 0.001096 |  | |
| 292.4086 | | | 0.001099 |  | |
| 292.6054 | | | 0.001095 |  | |
| 292.7855 | | | 0.001088 |  | |
| 292.9389 | | | 0.001098 |  | |
| 293.1075 | | | 0.001091 |  | |
| 293.2906 | | | 0.001088 |  | |
| 293.433 | | | 0.001089 |  | |
| 293.6127 | | | 0.001089 |  | |
| 294.2494 | | | 0.001088 |  | |
| 295.3864 | | | 0.00109 |  | |
|  | | |  |  | |
